# Supplementary material for: Estimating food resource availability in arid environments with Sentinel 2 satellite imagery
Source: PeerJ. 2020 May 26;8:e9209. doi: 10.7717/peerj.9209 (PMC7258894; doi:10.7717/peerj.9209)
Supplement: Dataset S1 — - Sheet 1: Each row corresponds to an observation per survey location. Columns represent: location ID, Latitude, Longitude, Cluster category (grass, shrub or bare), Month (October, December 2016 or January 2017), Total cover (percentage), Enneapogon seed-productivity (g/transect), Seed abundance (count of Enneapogon spiklets with seeds), Total abundance (count of total grass spiklets), MSAVI2, NDVI, Subset (1 = used in the GLMMs analysis). - Sheet 2: Vegetation matrix used in the cluster analysis. Each row corresponds to one survey location (ID in the first column). Each column represents the cover of every plant identified. [file peerj-08-9209-s006.xlsx]

## Sheet: raw_data
ID	Longitude	Latitude	Cluster	Month	Total_cover (%)	seed_productivity (g/transect)	Seeds_abundance	Total_abundance	MSAVI2	NDVI	Subset
A1	-30.9414	141.761	Bare	October	3	0	0	0	0.07417	0.1186
A2	-30.9414	141.769	Bare	October	3	0.155489	30	42	0.06935	0.12992	1
A3	-30.9412	141.753	Grass	October	12	0	0	0	0.05765	0.1063
A4	-30.9437	141.757	Grass	October	18	0.0921368	15	24	0.09968	0.19264	1
D1	-30.9586	141.766	Grass	October	18	0	0	0	0.11713	0.22586
D2	-30.9564	141.751	Bare	October	3	0	0	1	0.05605	0.1152
D3	-30.9586	141.755	Bare	October	6	0.16082	4	4	0.07133	0.12548	1
D4	-30.9597	141.761	Bare	October	3	0.0925977	5	7	0.08021	0.14692	1
F1	-30.9561	141.771	Grass	October	21	0.0944404	11	12	0.06595	0.12353	1
F2	-30.9572	141.771	Grass	October	24	0.0462687	1	1	0.11571	0.22812	1
F3	-30.9597	141.769	Grass	October	15	0	0	0	0.06677	0.12831
F4	-30.9606	141.774	Grass	October	21	0	0	1	0.07651	0.14222
FOR1	-30.9483	141.775	Grass	October	38	0.151944	52	62	0.07778	0.14543	1
FOR2	-30.9486	141.772	Grass	October	17	0.158122	8	8	0.08697	0.15654	1
FOR3	-30.9461	141.765	Shrub	October	24	0.00542144	2	2	0.11364	0.21343	1
G	-30.9483	141.753	Grass	October	15	0.141788	13	13	0.07962	0.16093	1
GH-A	-30.9442	141.766	Grass	October	19	0.0243662	1	1	0.16915	0.33085	1
GH-B	-30.948	141.768	Grass	October	38	0.0263121	9	10	0.07491	0.13416	1
GH-C	-30.9506	141.772	Shrub	October	52	0	0	0	0.18066	0.36915
GH-D	-30.9519	141.763	Bare	October	1	0.0339038	2	2	0.05667	0.08568	1
GH-E	-30.9463	141.774	Grass	October	45	0.217053	70	76	0.08374	0.15265	1
GH-F	-30.9526	141.776	Shrub	October	73	0	0	0	0.20258	0.43916
H	-30.955	141.77	Bare	October	6	0.123708	15	17	0.0816	0.16178	1
I	-30.9442	141.75	Bare	October	3	0.104919	15	24	0.04994	0.10009	1
J	-30.9507	141.77	Grass	October	22	0	0	0	0.10606	0.2814
K	-30.953	141.774	Shrub	October	79	0	0	0	0.28702	0.68696
N	-30.9481	141.76	Bare	October	4	0.034256	8	17	0.04736	0.09903
O	-30.954	141.766	Grass	October	15	0.0847815	6	7	0.07203	0.12648	1
P	-30.9499	141.774	Grass	October	15	0.0344713	4	18	0.11458	0.24152
Q	-30.9473	141.772	Grass	October	15	0.169294	22	23	0.06404	0.10815	1
S	-30.9536	141.766	Grass	October	15	0.042817	4	16	0.07694	0.13743
T	-30.9538	141.768	Grass	October	15	0.127005	21	27	0.07459	0.13227	1
U	-30.9546	141.768	Bare	October	3	0.135892	3	4	0.07501	0.14108	1
W	-30.9493	141.773	Grass	October	32	0.0682296	3	3	0.12627	0.2361	1
X	-30.9518	141.774	Shrub	October	21	0	0	0	0.09581	0.23194
Y	-30.9539	141.777	Grass	October	38	0	0	0	0.11249	0.21878
A1	-30.9414	141.761	Bare	December		0	0	0	0.03693	0.06834
A2	-30.9414	141.769	Bare	December		0.061	30	57	0.02878	0.06252	1
A3	-30.9412	141.753	Grass	December		0	0	0	0.01799	0.03916
A4	-30.9437	141.757	Grass	December		0	15	6	0.03542	0.08327
D1	-30.9586	141.766	Grass	December		0	0	1	0.04756	0.11004
D2	-30.9564	141.751	Bare	December		0	0	0	0.00474	0.01283
D3	-30.9586	141.755	Bare	December		0	4	0	0.01778	0.03544
D4	-30.9597	141.761	Bare	December		0.049	5	3	0.03382	0.07238	1
F1	-30.9561	141.771	Grass	December		0	11	7	0.03146	0.07067
F2	-30.9572	141.771	Grass	December		0	1	4	0.03375	0.08165
F3	-30.9597	141.769	Grass	December		0	0	6	0.02601	0.05808
F4	-30.9606	141.774	Grass	December		0	0	0	0.02358	0.05606
FOR1	-30.9483	141.775	Grass	December		0.022	52	53	0.04074	0.09046	1
FOR2	-30.9486	141.772	Grass	December		0.217	8	3	0.0355	0.07082	1
FOR3	-30.9461	141.765	Shrub	December		0	2	0	0.05437	0.12813
G	-30.9483	141.753	Grass	December		0	13	0	0.03049	0.07376
GH-A	-30.9442	141.766	Grass	December		0	1	0	0.0496	0.11288
GH-B	-30.948	141.768	Grass	December		0	9	7	0.03367	0.06727
GH-C	-30.9506	141.772	Shrub	December		0	0	0	0.07913	0.26891
GH-D	-30.9519	141.763	Bare	December		0	2	0	0.03009	0.05188
GH-E	-30.9463	141.774	Grass	December		0.057	70	99	0.04971	0.10693	1
GH-F	-30.9526	141.776	Shrub	December		0	0	0	0.08353	0.25974
H	-30.955	141.77	Bare	December		0.056	15	13	0.03116	0.07406	1
I	-30.9442	141.75	Bare	December		0.078	15	7	0.00773	0.01814	1
J	-30.9507	141.77	Grass	December		0	0	0	0.03954	0.15348
K	-30.953	141.774	Shrub	December		0	0	0	0.04247	0.2
N	-30.9481	141.76	Bare	December		0.128	8	2	0.00803	0.0201	1
O	-30.954	141.766	Grass	December		0	6	0	0.02996	0.06244
P	-30.9499	141.774	Grass	December		0	4	4	0.0439	0.11989
Q	-30.9473	141.772	Grass	December		0.128	22	9	0.02525	0.04576	1
S	-30.9536	141.766	Grass	December		0	4	6	0.02018	0.04288
T	-30.9538	141.768	Grass	December		0.069	21	22	0.02632	0.05348	1
U	-30.9546	141.768	Bare	December		0.109	3	5	0.02663	0.05707	1
W	-30.9493	141.773	Grass	December		0.273	3	4	0.05584	0.11944	1
X	-30.9518	141.774	Shrub	December		0	0	0	0.0301	0.0967
Y	-30.9539	141.777	Grass	December		0	0	0	0.05267	0.12359
A1	-30.9414	141.761	Bare	January		0	0	17	0.06157	0.10405
A2	-30.9414	141.769	Bare	January		0	30	51	0.03977	0.08004
A3	-30.9412	141.753	Grass	January		0	0	3	0.03951	0.07803
A4	-30.9437	141.757	Grass	January		0	15	15	0.0502	0.10601
D1	-30.9586	141.766	Grass	January		0	0	0	0.05093	0.10712
D2	-30.9564	141.751	Bare	January		0	0	1	0.02735	0.06418
D3	-30.9586	141.755	Bare	January		0.142	4	17	0.02934	0.05512	1
D4	-30.9597	141.761	Bare	January		0	5	5	0.04611	0.0901
F1	-30.9561	141.771	Grass	January		0	11	10	0.03713	0.07462
F2	-30.9572	141.771	Grass	January		0	1	1	0.04557	0.09699
F3	-30.9597	141.769	Grass	January		0	0	12	0.02615	0.05302
F4	-30.9606	141.774	Grass	January		0.176	0	4	0.04958	0.10183	1
FOR1	-30.9483	141.775	Grass	January		0	52	98	0.04776	0.09395
FOR2	-30.9486	141.772	Grass	January		0	8	12	0.0554	0.10299
FOR3	-30.9461	141.765	Shrub	January		0	2	8	0.06681	0.13826
G	-30.9483	141.753	Grass	January		0.142	13	10	0.03929	0.08599	1
GH-A	-30.9442	141.766	Grass	January		0	1	0	0.07234	0.14746
GH-B	-30.948	141.768	Grass	January		0	9	33	0.06162	0.11904
GH-C	-30.9506	141.772	Shrub	January		0	0	0	0.11245	0.30911
GH-D	-30.9519	141.763	Bare	January		0	2	3	0.03338	0.05466
GH-E	-30.9463	141.774	Grass	January		0.003	70	164	0.06254	0.1177	1
GH-F	-30.9526	141.776	Shrub	January		0	0	0	0.10048	0.2734
H	-30.955	141.77	Bare	January		0	15	39	0.04421	0.09244
I	-30.9442	141.75	Bare	January		0.055	15	46	0.0263	0.05629	1
J	-30.9507	141.77	Grass	January		0	0	0	0.04767	0.14661
K	-30.953	141.774	Shrub	January		0	0	0	0.06464	0.23175
N	-30.9481	141.76	Bare	January		0	8	27	0.01974	0.0444
O	-30.954	141.766	Grass	January		0	6	18	0.0451	0.08526
P	-30.9499	141.774	Grass	January		0	4	27	0.07125	0.17043
Q	-30.9473	141.772	Grass	January		0	22	43	0.03326	0.05785
S	-30.9536	141.766	Grass	January		0	4	29	0.04626	0.08953
T	-30.9538	141.768	Grass	January		0	21	96	0.02822	0.05266
U	-30.9546	141.768	Bare	January		0.01	3	19	0.0391	0.07748	1
W	-30.9493	141.773	Grass	January		0	3	11	0.07578	0.15138
X	-30.9518	141.774	Shrub	January		0	0	0	0.04089	0.12315
Y	-30.9539	141.777	Grass	January		0	0	0	0.05732	0.12402

## Sheet: Vegetation matrix
	Atriplex	Calotis	Carrichtera	Chenopodium	Enneapogon	Erodium	Maireana	Medicago	Myoporum	Pimelea	Plantago	Rhodanthe	Rostraria	Sclerolaena	Senecio	Senna	Sporobolus	Tetragonia	Acacia	Poaceae.sp
A1	0	0	0	0	0	0	1	0	0	0	0	1	0	0	0	0	0	0	0	1
A2	0	0	1	0	5	0	1	0	0	0	0	1	0	0	0	0	0	0	0	0
A3	0	0	0	1	0	0	15	0	0	0	0	1	0	1	0	0	0	0	0	0
A4	0	0	0	0	3	0	15	0	0	0	0	3	0	0	0	0	0	0	0	0
D1	0	0	0	0	0	0	0	3	0	0	0	3	0	3	0	0	0	0	0	0
D2	0	0	0	0	0	0	0	0	0	0	0	3	0	0	0	0	0	0	0	0
D3	0	0	1	0	1	0	0	0	0	0	3	3	0	1	0	0	0	0	0	0
D4	0	0	0	0	3	0	1	0	0	0	0	0	0	1	0	1	0	0	0	0
F1	3	1	0	0	0	0	0	0	0	0	0	3	0	3	0	0	0	0	0	0
F2	0	0	0	0	0	0	3	15	0	0	0	15	0	3	0	0	0	0	0	0
F3	0	15	3	0	0	0	0	15	0	1	1	1	1	3	0	0	0	0	0	0
F4	0	1	0	0	1	0	0	0	0	0	1	15	0	3	0	0	0	0	0	0
FOR1	0	0	0	1	35	0	0	0	0	0	0	0	0	0	0	3	0	0	0	3
FOR2	0	1	0	0	1	0	3	0	0	0	1	15	1	0	0	3	0	1	0	0
FOR3	0	0	0	0	0	0	0	0	0	0	0	0	15	0	6	0	0	3	6	0
G	0	0	0	0	3	3	15	0	0	0	0	3	0	1	0	0	0	0	0	0
GH-A	0	0	0	0	0	0	1	6	0	0	0	15	0	0	0	0	0	6	3	0
GH-B	0	0	0	0	1	0	3	0	0	0	0	35	1	0	0	0	0	0	3	1
GH-C	0	1	0	0	0	0	0	50	6	1	0	0	0	0	6	6	0	0	0	0
GH-D	0	0	0	0	0	0	0	0	0	0	0	1	0	0	0	0	0	0	0	0
GH-E	0	0	0	0	35	3	3	0	0	1	0	3	0	3	0	3	0	0	0	0
GH-F	0	0	3	1	0	0	1	35	3	0	0	0	15	0	0	15	0	0	15	0
I	0	0	0	0	0	0	3	0	0	0	0	3	0	0	0	0	3	0	0	0
J	3	0	0	0	0	0	0	20	0	0	0	0	6	0	0	0	0	5	0	0
N	0	0	1	0	0	0	0	0	0	0	1	1	0	1	0	0	0	0	0	0
Y	3	0	0	0	0	0	3	52	0	0	0	0	15	0	0	0	0	6	3	0
S	0	0	0	0	3	0	0	0	0	0	0	15	0	3	0	0	3	0	0	0
O	0	0	0	0	1	0	0	0	0	0	0	10	0	2	0	0	1	0	1	0
U	0	0	0	0	0	0	0	0	0	0	0	0	0	3	0	0	0	0	0	0
T	0	0	0	0	15	0	0	0	0	0	0	3	0	3	0	0	0	0	0	0
H	0	0	0	0	3	0	0	0	0	0	0	3	0	3	0	0	3	0	0	3
X	0	0	0	0	0	0	3	15	0	0	0	3	3	0	3	3	0	0	0	0
K	0	0	0	0	0	3	0	70	3	0	0	0	0	0	3	0	0	0	15	0
P	0	0	0	0	3	0	3	0	0	0	0	15	0	0	0	0	0	0	0	0
W	0	0	0	0	0	0	0	40	3	0	0	3	0	0	3	3	0	0	3	0
Q	0	0	0	0	0	0	0	0	0	0	0	15	0	0	0	0	0	0	0	0
